# Supplementary material for: Highly controllable and reproducible one-step synthesis of β-NaYF4:Er3+@NaYbF4@NaYF4 upconversion nanoparticles for Sb2(S,Se)3 solar cells with enhanced efficiency
Source: Royal Society of Chemistry journal article supplement (doi:10.1039/d3ta00241a), 2023-01-01
Supplement: d3ta00241a1.pdf [file d3ta00241a1.pdf]

## Supporting information

### Highly Controllable and Reproducible One-step Synthesis of $\beta$ - $\text{NaYF}_4:\text{Er}^{3+}@\text{NaYbF}_4@\text{NaYF}_4$ Upconversion Nanoparticles for $\text{Sb}_2(\text{S},\text{Se})_3$ Solar Cell with Enhanced Efficiency

*Xin Jin, Shin Woei Leow, Yanan Fang, Lydia Helena Wong\**

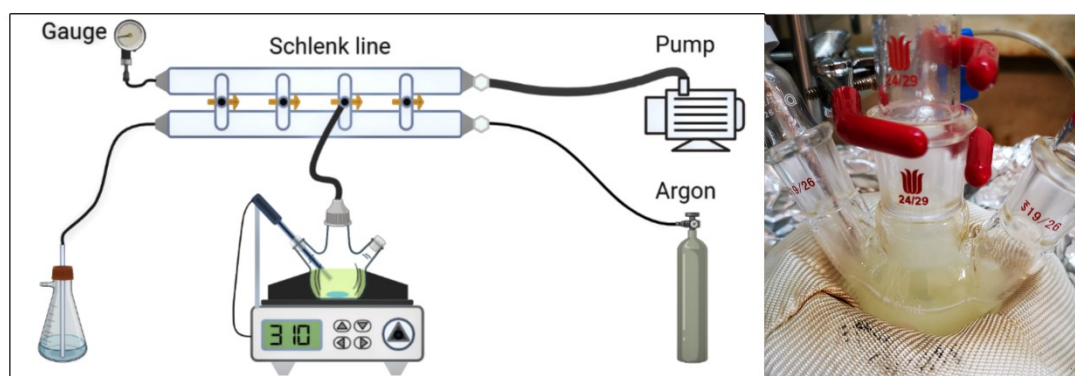

**Figure S1.** Schematic illustration of experimental setup for synthesizing UCNPs (left) and the digital photo of the product (right).

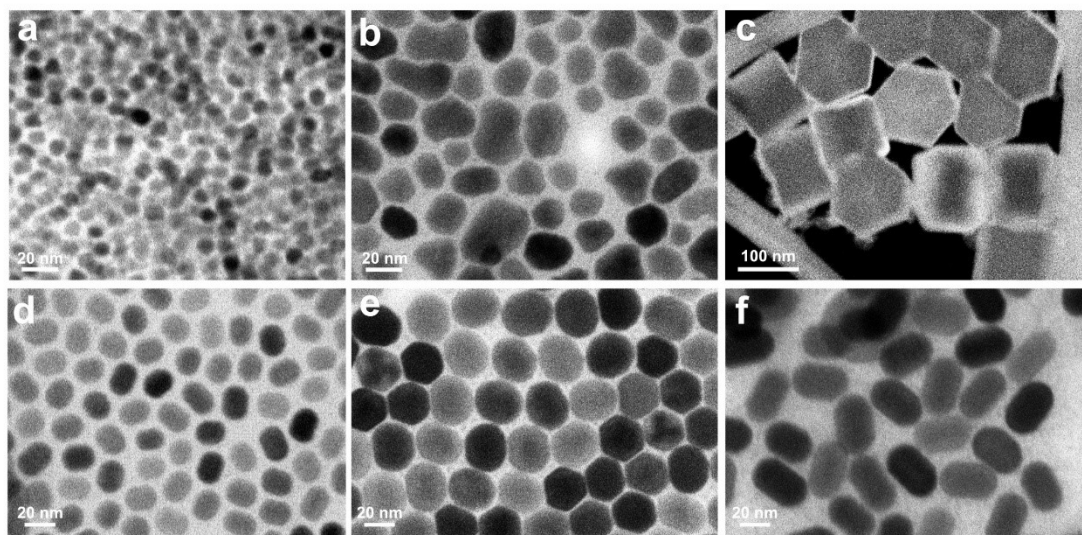

**Figure S2.** SEM image showing the  $\text{NaYF}_4$  crystals prepared with temperature profile (a) 1, (b) 2 and (c) 4 as shown in Figure 1b. SEM images of  $\text{NaYF}_4$  crystals prepared based on temperature profile 3 with growth time of (d) 18 min, (e) 30 min and (f) 45 min.

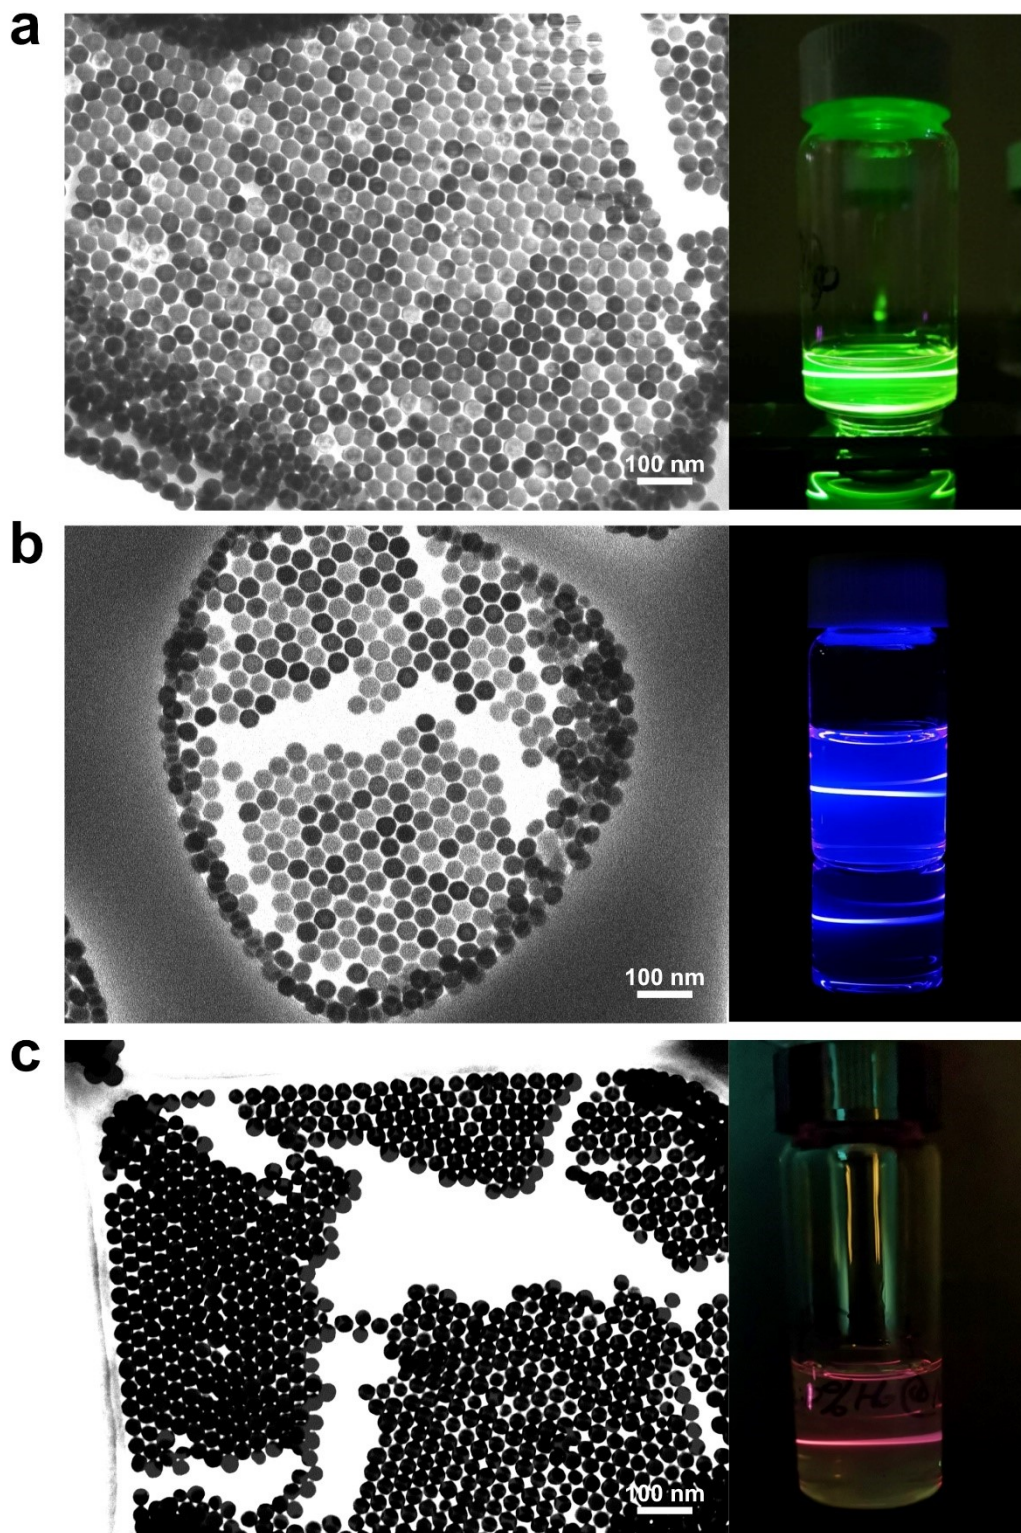

**Figure S3.** SEM images and corresponding digital photos of emission of (a)  $\text{NaYF}_4:10\%\text{Er}@NaYbF_4$ , (b)  $\text{NaYF}_4:10\%\text{Tm}@NaYbF_4$  and (c)  $\text{NaYF}_4:10\%\text{Ho}@NaYbF_4:40\%\text{Ce}$  UCNPs.

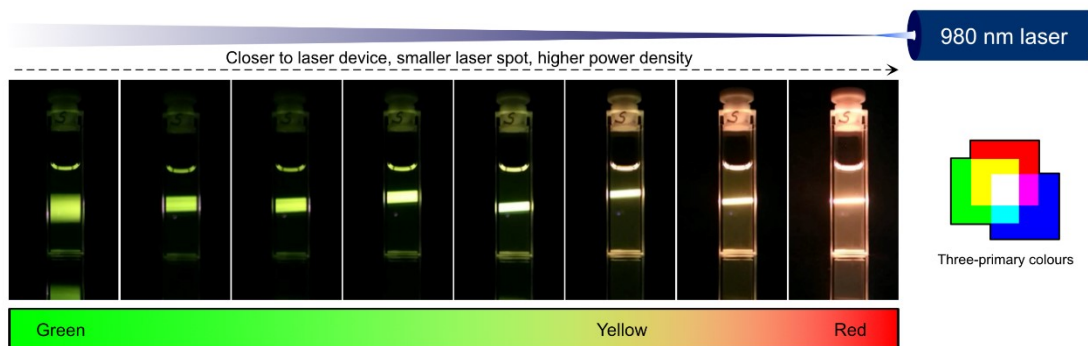

**Figure S4.** Digital photos showing the emission variation of  $\text{NaYF}_4:10\%\text{Er}@NaYbF_4@NaYF_4$  UCNPs as enhancing the excitation power density by decreasing the distance between sample and laser device (from left to right).

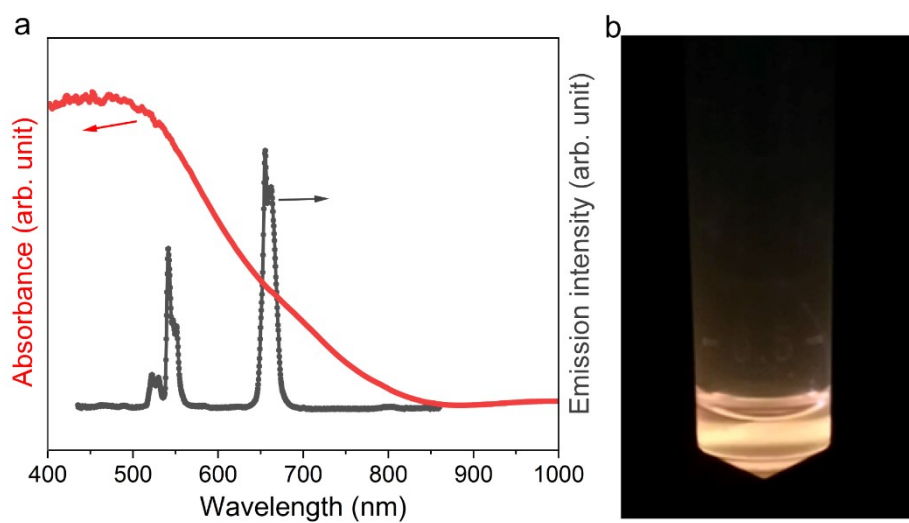

**Figure S5.** (a) Schematic diagram showing the overlap between the emission of  $\text{NaYF}_4:10\%\text{Er}@NaYbF_4@NaYF_4$  UCNPs and the absorption spectrum of  $\text{Sb}_2(\text{S,Se})_3$  thin film ( $E_g = 1.55$  eV in this study). (b) Digital photo showing the emission of the mixed solution of Spiro-OMeTAD with UCNPs illuminated by 980 nm laser.

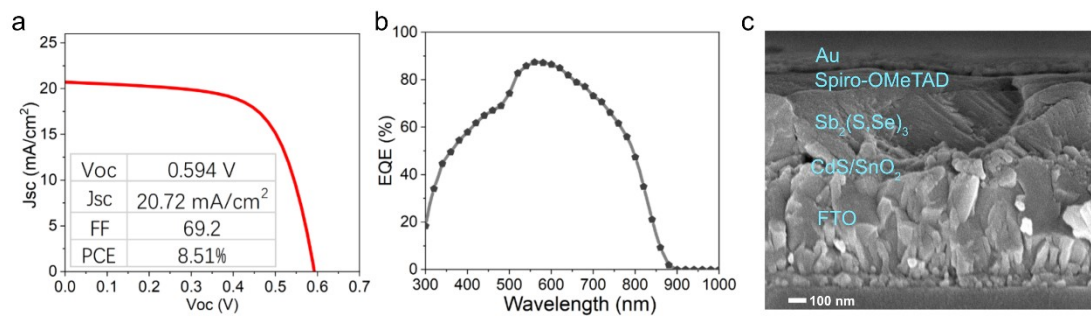

**Figure S6.** The (a) J-V curve, (b) EQE and the corresponding (c) cross-sectional SEM image of a typical Sb<sub>2</sub>(S,Se)<sub>3</sub> solar cell without UCNPs.
